# Supplementary material for: Origins of intrinsic p-type conductivity, p–n transition and substoichiometry in SrO
Source: Royal Society of Chemistry journal article supplement (doi:10.1039/d4ta07690g), 2025-01-01
Supplement: d4ta07690g1.pdf [file d4ta07690g1.pdf]

supporting information (SI)

Origins of Intrinsic p-type Conductivity, p-n Transition and Substoichiometry in SrO

Taifeng Liu<sup>1,2\*</sup>, Xingfan Zhang<sup>2</sup>, Jingcheng Guan<sup>2</sup>, Xuebo Chen<sup>1,3\*</sup>, You Lu<sup>4</sup>, Thomas W. Keal<sup>4</sup>, John Buckeridge<sup>5</sup>, C. Richard A. Catlow<sup>2,6</sup>, Alexey A. Sokol<sup>2\*</sup>,

1. National & Local Joint Engineering Research Center for Applied Technology of Hybrid Nanomaterials // College of Chemistry and Molecular Sciences, Henan University, Kaifeng 475004, P. R. China.
2. Kathleen Lonsdale Materials Chemistry, Department of Chemistry, University College London, 20 Gordon Street, London, WC1H0AJ, United Kingdom.
3. Key Laboratory of Theoretical and Computational Photochemistry of Ministry of Education, Department of Chemistry, Beijing Normal University, Beijing 100875, P. R. China.
4. Scientific Computing Department, STFC Daresbury Laboratory, Warrington WA4 4AD, Cheshire, United Kingdom.
5. School of Engineering, London South Bank University, 103 Borough Road, London SE1 OAA, United Kingdom.
6. School of Chemistry, Cardiff University, Park Place, Cardiff, CF10 1AT, United Kingdom.

Corresponding authors: T. Liu: [tliu@vip.henu.edu.cn](mailto:tliu@vip.henu.edu.cn); A. Sokol: [a.sokol@ucl.ac.uk](mailto:a.sokol@ucl.ac.uk);

T. Liu and X. Zhang contributed equally to this work as co-first authors.

1. Energies curves as a function of the Sr-Sr bond length

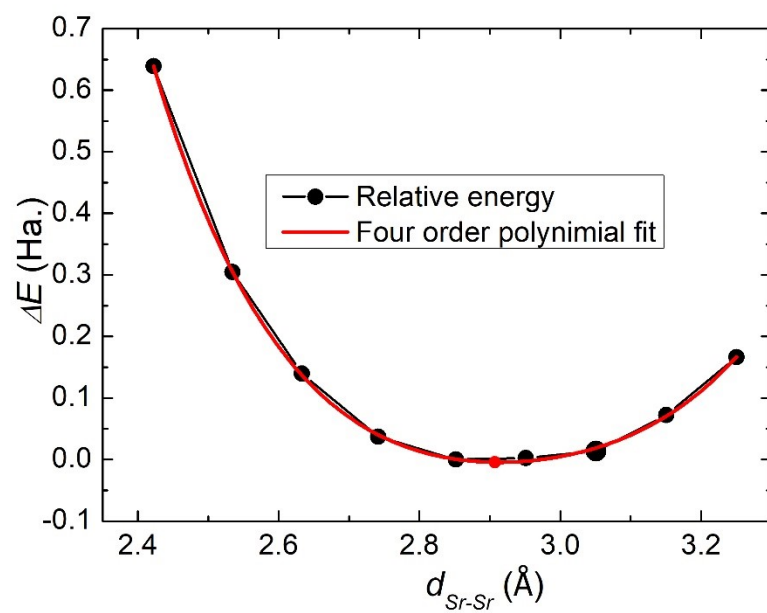

Figure S1. The energy curve as a function of the Sr-Sr bond length, and the red line is fitted with a fourth-order polynomial.

## 2. Formation energies of all defects at VBM

Table S3. The data of formation energies of  $V_o$ ,  $V_{Sr}$ ,  $O_i$ , and  $Sr_i$  under oxygen rich conditions at the VBM. For oxygen poor conditions, the difference is the SrO formation enthalpy which we take  $-6.182 \text{ eV}^1$ . Using these data, one can repeat the Figure 1 and 3 in the main text.

| Defects  | Charge | Oxygen rich |             | Oxygen poor |      |
|----------|--------|-------------|-------------|-------------|------|
|          |        | PBE0        | BB1K        | PBE0        | BB1K |
| $V_o$    | +2     | -0.73153419 | -0.58478943 | -6.182      |      |
|          | +1     | 2.129556934 | 2.262364999 |             |      |
|          | 0 ↑ ↑  | 7.983211073 | 8.209178628 |             |      |
|          | 0 ↑ ↓  | 6.525667362 | 6.445244413 |             |      |
|          | -1 ↑ ↑ | 16.79394583 | 17.25901131 |             |      |
|          | -1 ↑ ↓ | 15.58615147 | 15.63017921 |             |      |
| $V_{Sr}$ | -2     | 5.201885784 | 5.674392243 | +6.182      |      |
|          | -1     | 3.689979208 | 4.03301462  |             |      |
|          | 0      | 2.42133562  | 2.661055248 |             |      |
|          | +1     | 1.311229407 | 1.400374611 |             |      |
|          | +2     | 0.429153163 | 0.369767893 |             |      |
| $O_i$    | -2     | 8.408982115 | 8.607281794 | +6.182      |      |
|          | -1     | 4.973268892 | 5.231508931 |             |      |
|          | 0 ↑ ↑  | 2.871824832 | 3.074755074 |             |      |
|          | 0 ↑ ↓  | 0.62700147  | 0.665963527 |             |      |
|          | +1     | 1.288870464 | 1.470439026 |             |      |
| $Sr_i$   | +2     | 3.752012652 | 3.866544523 | -6.182      |      |
|          | +1     | 9.007137047 | 9.15382176  |             |      |
|          | 0      | 14.84527905 | 14.95443658 |             |      |
|          | -1     | 20.76637337 | 20.91478002 |             |      |

References:

1. I. J. Brink and C. E. Holley, *The Journal of Chemical Thermodynamics*, 1978, **10**, 259-266.
